# Supplementary material for: Metabolic Engineering of Escherichia coli for Hyperoside Biosynthesis
Source: MDPI journal article supplement (doi:10.3390/microorganisms10030628), 2022-03-16
Supplement: s1 [file s1]

*Supporting Information*

# Metabolic Engineering of *Escherichia coli* for Hyperoside Biosynthesis

Guosi Li <sup>1</sup>, Fucheng Zhu <sup>1</sup>, Peipei Wei <sup>1</sup>, Hailong Xue <sup>2</sup>, Naidong Chen <sup>1</sup>, Baowei Lu <sup>1</sup>, Hui Deng <sup>1</sup>, Cunwu Chen <sup>1,\*</sup>, Xinjian Yin <sup>3,\*</sup>

<sup>1</sup> Anhui Engineering Laboratory for Conservation and Sustainable Utilization of Traditional Chinese Medicine Resources, Department of Biological and Pharmaceutical Engineering, West Anhui University, Lu'an, 237012, Anhui, China; 02000159@wxc.edu.cn (G.L.); fucheng323@163.com (F.Z.); 1209091181@qq.com (P.W.); 2004cnd@163.com; lu\_baowei123@126.com; dhup@qq.com

<sup>2</sup> Key Laboratory of Biomass Chemical Engineering of Ministry of Education, College of Chemical and Biological Engineering, Zhejiang University, Hangzhou, 310027, China; 11428043@zju.edu.cn

<sup>3</sup> School of Marine Science, Sun Yat-sen University, Zhuhai, 519080, China

\* Correspondence: chengcw@wxc.edu.cn (C.C.); yinxj5@mail.sysu.edu.cn (X.Y.)

## List of Entries

|                                                                          |   |
|--------------------------------------------------------------------------|---|
| Figure S1 Multiple sequence alignment of PhUGT, MdP2'GT, and GmSGT2..... | 3 |
| Figure S2 $^{13}\text{C}$ NMR spectra of purified hyperoside. ....       | 3 |
| Figure S3 $^1\text{H}$ NMR spectra of purified hyperoside. ....          | 4 |



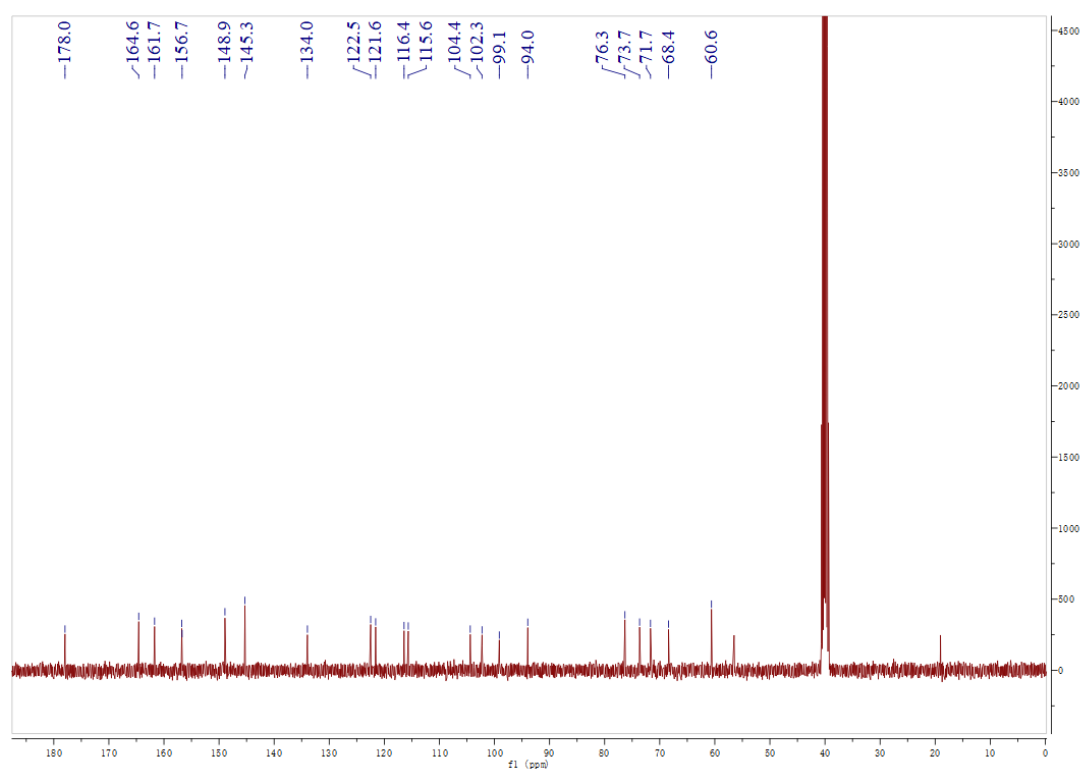

Figure S3.  $^1\text{H}$  NMR spectra of purified hyperoside.
